# Supplementary material for: The anti-cancer drugs curaxins target spatial genome organization
Source: PubMed Central journal article supplement (PMC6441033; doi:10.1038/s41467-019-09500-7), 2019-03-29
Supplement: 41467_2019_9500_MOESM3_ESM.pdf [file 41467_2019_9500_MOESM3_ESM.pdf]

## **Description of Additional Supplementary Files**

File Name: Supplementary Data 1

Description: A list of PSYHIC-annotated spatial contacts between genes and potential remote regulatory elements.

File Name: Supplementary Data 2

Description: Statistics of the Hi-C libraries sequencing and mapping, and the results of specialized Hi-C reproducibility tests.
